# **TGFβ1 overexpression is associated with improved survival and low tumor cell proliferation in patients with early-stage pancreatic ductal adenocarcinoma**

**Evan S. Glazer<sup>1,3</sup>, Eric Welsh<sup>2</sup>, Jose M. Pimiento<sup>1</sup>, Jamie K. Teer<sup>2</sup>, Mokenge P. Malafa<sup>1</sup>**

<sup>1</sup>Department of Gastrointestinal Oncology, H. Lee Moffitt Cancer Center and Research Institute, Tampa, FL, USA

<sup>2</sup>Department of Biostatistics and Bioinformatics, H. Lee Moffitt Cancer Center and Research Institute, Tampa, FL, USA

<sup>3</sup>Department of Surgery, University of Tennessee Health Sciences Center, Memphis, TN, USA

**Correspondence to:** Mokenge P. Malafa, **email:** mokenge.malafa@moffitt.org

**Keywords:** pancreatic carcinoma, TGF-β, Ki-67, MKI67

**Received:** June 07, 2016

**Accepted:** September 16, 2016

**Published:** November 23, 2016

## **ABSTRACT**

The role of transforming growth factor beta-type-1 (TGFβ1) in pancreatic ductal adenocarcinoma (PDAC) progression is stage-dependent. We hypothesized that TGFβ1 expression is associated with survival and proliferation markers in patients with early-stage PDAC. We acquired clinicopathologic, treatment, and mRNA expression data from The Cancer Genome Atlas data set for 106 patients identified with stage I/II PDAC who underwent pancreaticoduodenectomy. Patients were categorized as high expression when mRNA expression was ≥75th percentile for each gene. Average log<sub>2</sub> mRNA expression of TGFβ1 in patients with high expression was 11.6 ± 0.2 and 10.5 ± 0.6 in patients with low expression ( $P < 0.001$ ). Low TGFβ1 expression is associated with shorter median survival compared with high TGFβ1 expression (17 versus at least 60 months;  $P = 0.005$ ). Patients with tumors demonstrating high MKI67 (the gene encoding Ki-67) expression have shorter median survival versus those with lower MKI67 expression (16 versus 20 months;  $P = 0.026$ ). TGFβ1 and MKI67 are inversely associated ( $P = 0.009$ ). On multivariate analysis, improved survival is associated with TGFβ1 overexpression ( $P = 0.017$ ), adjuvant chemotherapy ( $P = 0.001$ ), and adjuvant radiotherapy ( $P = 0.017$ ), whereas positive surgical margins are associated with worse survival ( $P = 0.002$ ). In patients who undergo pancreaticoduodenectomy for PDAC, high TGFβ1 expression may counteract the worse survival associated with high proliferation.

## **INTRODUCTION**

The precise role of transforming growth factor beta type 1 (TGFβ1) in the progression of pancreatic ductal adenocarcinoma (PDAC) is unknown, and its relation to survival is context dependent [1, 2]. This is referred to as the TGFβ paradox, where TGFβ expression in early tumors (AJCC stage I and II) is a favorable characteristic but a detrimental characteristic in advanced-stage III or IV disease [3].

TGFβ is a complex signaling molecule that exists in 3 isoforms and as part of large family of polypeptides [4]. Although it is critical for growth arrest, it is also a growth factor responsible for differentiation in embryonic progenitor cells [5]. Among other signaling cascades, the canonical pathway for activated TGFβ receptors leads to downstream serine phosphorylation of SMAD

transcription factors [6]. Important in PDAC, TGFβ signaling induces peritumoral fibrosis by myofibroblast differentiation when exposed to radiation [7] or by increased collagen production in the setting of chronic pancreatitis [8].

Although the role of TGFβ has been better delineated in late-stage PDAC, its role in early-stage PDAC is unclear. In late-stage PDAC, targeted therapeutics against the TGFβ pathway are undergoing clinical trials as data are more mature in this area [9] and suggest that angiogenesis is critical to PDAC tumorigenesis [3, 10]. There are conflicting data in the literature regarding the role of TGFβ in patients with early-stage PDAC. Some evidence has suggested that early-stage tumors are similar to late-stage tumors in terms of a proangiogenic environment [11]. However, other data have suggested that TGFβ blocks tumor cell proliferation [12]. Due to these

conflicting data, we investigated the association between *TGFB1* and RNA expression of the proliferation marker Ki-67 in PDAC.

Because of its complex signaling cascade, it has been suggested that *TGFβ* is both a proto-oncogene and tumor suppressor gene, depending on the context [6, 13]. Work by Zhang et al. have demonstrated that *TGFβ1* overexpression inhibits cell growth via SMAD3 phosphorylation, hence behaving as a tumor suppressor [3]. Likewise, that group also provided limited data that *TGFβ1* overexpression results in SMAD7 activation, which leads to  $\beta$ -catenin/VEGF-A signaling and tumor neo-angiogenesis. Others have demonstrated similar oncogenic behavior of *TGFβ*, especially in the context of proliferation and inflammation [2, 10].

A potential mechanism for *TGFβ1*-mediated carcinogenesis is an overwhelming, proliferative peritumoral desmoplastic response [14]. In a non-malignant environment, collagen production by fibroblasts is mediated by *TGFβ1* signaling [7, 15, 16]. In the malignant setting, pre-clinical and *in vivo* data have suggested that collagen deposition by pancreatic stellate cells and pancreatic carcinoma cells both lead to a pro-carcinogenic desmoplastic response [17–19]. In addition, increased proliferation as measured by Ki-67 expression in PDAC cancer cells is associated with therapeutic changes in animal models and early recurrence in retrospective human studies [20–22]. Interestingly, an mRNA transcript leading to type I collagen production, *COL1A2*, has been associated with proliferative events and markers of aggressive tumor biology, including epithelial to mesenchymal transition [8]. Another group recently demonstrated that the same specific mRNA transcript (*COL1A2*) may be a serum biomarker for pancreatic carcinoma [19].

We hypothesized that survival in patients with resected early-stage PDAC is associated with *TGFβ1* and *MKI67* expression (the gene encoding the proliferation marker Ki-67). To control for unknown features of cancer biology, we utilized a strict inclusion/exclusion criteria to identify a relatively homogenous patient population from The Cancer Genome Atlas (TCGA) with stage I and II PDAC who underwent pancreaticoduodenectomy.

## RESULTS

### Early pancreatic ductal adenocarcinoma in the TCGA data set

Our TCGA data set consisted of 175 tumor samples with pancreatic malignancies. Five of these patients demonstrated histologies not consistent with “typical” PDAC to include neuroendocrine and mucinous colloid carcinomas. Likewise, a minority of patients underwent distal pancreatectomy, total pancreatectomy, or other pancreatic resection (n = 38) and 10 patients had stage III or IV disease.

After applying the inclusion and exclusion criteria, 106 patients were identified for analyses. Of these patients, the average age was  $65 \pm 11$  years, 58% of patients were male, and 91% were white. The median follow-up time was 15 months (range, 0.3–75 months). Seven patients (7%) had a documented family history of PDAC. Only 1 patient received neoadjuvant therapy. In our patient group, 13%, 58%, and 28% of tumors were histologically grade I, II, and III/IV, respectively. The mean number of lymph nodes examined was  $18 \pm 8$  per patient with an average of  $3 \pm 3$  positive lymph nodes per patient. Overall, 60 patients (57%) received a margin-negative (R0) resection, while 56 patients received margin-positive resections (R1 or R2).

### *TGFβ1* expression in early PDAC from the TCGA

The average expression of *TGFβ1* in the top quartile (high expression group) was  $11.6 \pm 0.2$ , whereas it was  $10.5 \pm 0.6$  in patients with low expression ( $P < 0.001$ , Figure 1A). mRNA expression of *MKI67* was  $11.2 \pm 0.4$  in the high expression group and  $9.8 \pm 0.8$  in the low expression group (Figure 1B,  $P < 0.001$ ). Finally,  $\log_2$  mRNA expression of *COL1A2* was  $17.5 \pm 0.5$  in the high expression group and  $15.7 \pm 1.1$  in the low expression group ( $P < 0.001$ , Figure 1C).

### High *TGFβ1* expression is associated with improved overall survival

The clinical and treatment characteristics for patients with tumors expressing high or low levels of *TGFβ1* were similar between the two groups, with the exception of radiotherapy (Table 1). Low *TGFβ1* expression was associated with median survival of 17 months, whereas median survival was not reached for the high *TGFβ1* expression group (at least 60 months, Figure 2;  $P = 0.007$ ). All long-term survivors ( $> 40$  months) were in the high *TGFβ1* expression group. The univariate Cox proportion hazard ratio (HR) for high *TGFβ1* group was 0.35 ( $P = 0.009$ ; Table 2). Finally, the mean  $\log_2$  expression level of *TGFβ1* in patients with a family history of PDAC was lower than in patients without a family history of PDAC (10.18 versus 10.84;  $P = 0.02$ ).

Interestingly, high mRNA expression of SMAD3, SMAD4, and *TGFβR1* were not associated with survival ( $P = 0.87$ , 0.53, and 0.14, respectively). Likewise, there was no association between the mRNA expressions of these genes with expression of *TGFβ1* (each  $P > 0.1$ ).

### Increased proliferation is associated with worse survival

Because Ki-67 is an established marker for cell proliferation in cancer, we investigated its mRNA

**Table 1: Patient and treatment characteristics**

| Characteristic                             | TGFβ1 Low     | TGFβ1 High    | P Value      |
|--------------------------------------------|---------------|---------------|--------------|
|                                            | n = 78        | n = 28        |              |
| Age, mean ± SD                             | 65 ± 11 years | 66 ± 10 years | 0.61         |
| Male, n (%)                                | 46 (58%)      | 16 (59%)      | 0.92         |
| AJCC Stage                                 |               |               | 0.96         |
| T1-2                                       | 8 (10%)       | 5 (18%)       |              |
| T3                                         | 70 (90%)      | 23 (82%)      |              |
| N1                                         | 63 (80%)      | 21 (78%)      |              |
| Family history of pancreatic cancer, n (%) | 7 (9%)        | 0 (0%)        | 0.11         |
| High-grade tumor, n (%)                    | 22 (28%)      | 8 (29%)       | 0.97         |
| Positive surgical margin, n (%)            | 34 (44%)      | 12 (43%)      | 0.9          |
| Radiotherapy, n (%)                        | 17 (22%)      | 15 (57%)      | <b>0.003</b> |
| Chemotherapy, n (%)                        | 55 (71%)      | 21 (75%)      | 0.65         |

expression in PDAC. Patients with tumors demonstrating *MKI67* expression  $\geq 75$ th percentile have shorter median survival versus patients with tumors demonstrating lower *MKI67* expression (16 months versus 20 months;  $P = 0.026$ , Figure 3). Interestingly, patients in the high *MKI67* expression group showed lower levels of

*TGFβ1* expression compared with patients in the low *MKI67* expression group (0.07 versus 0.33;  $P = 0.009$ ). Furthermore, 32% of patients with low tumor *TGFβ1* expression have high *MKI67* expression, whereas only 7% of patients in the high *TGFβ1* expression group have high *MKI67* expression ( $P = 0.009$ ).

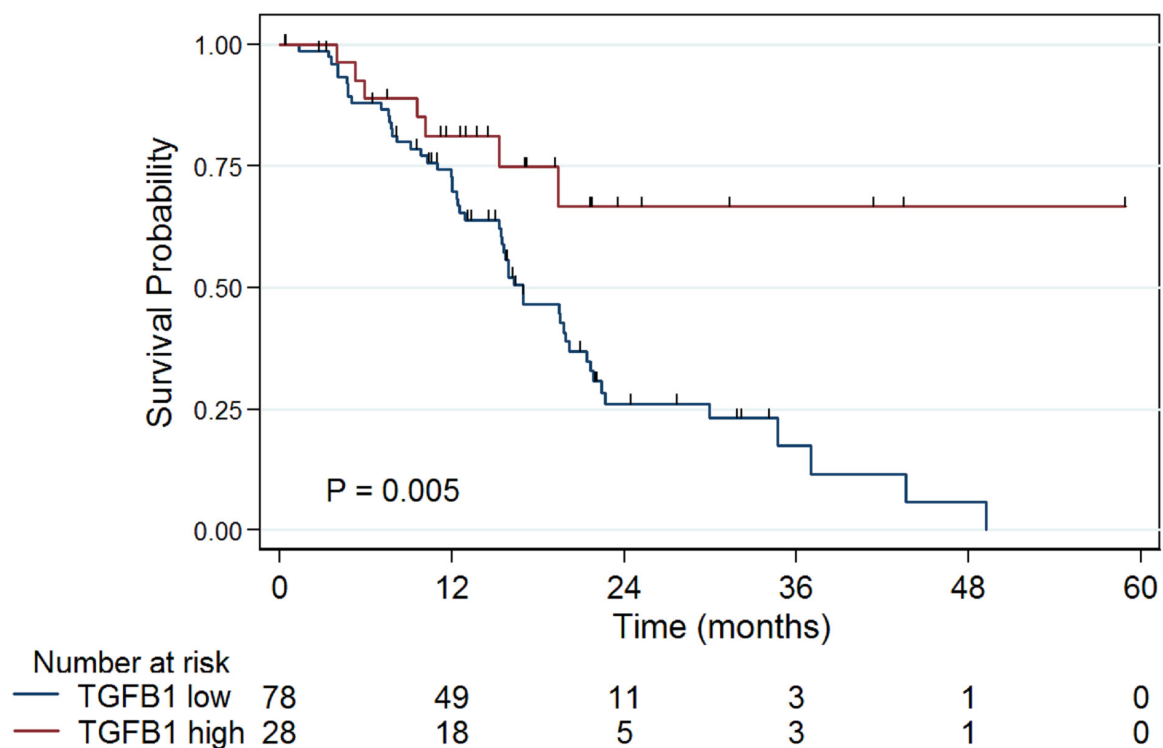**Figure 1: Graphical representation of the log<sub>2</sub> mRNA levels of *TGFβ1* A. *MKI67* B. *COL1A2* C.**

**Table 2: Characteristics associated with overall survival**

| Variable                      | Univariate Cox HR | P Value | Multivariate Cox HR | P Value      |
|-------------------------------|-------------------|---------|---------------------|--------------|
| Age, per year                 | 1.03              | 0.03    | 1.01                | 0.428        |
| Male gender                   | 0.67              | 0.13    |                     |              |
| Family history                | 2.26              | 0.06    | <b>3.73</b>         | <b>0.02</b>  |
| Positive lymph nodes          | 2.61              | 0.019   | <b>3.68</b>         | <b>0.013</b> |
| Positive surgical margin      | 2.3               | 0.003   | <b>3.37</b>         | <b>0.002</b> |
| High-grade tumor              | 1.67              | 0.07    | 1.62                | 0.179        |
| Chemotherapy                  | 0.39              | 0.001   | <b>0.30</b>         | <b>0.001</b> |
| Radiotherapy                  | 0.36              | 0.003   | <b>0.38</b>         | <b>0.017</b> |
| High <i>TGFβ1</i> expression  | 0.35              | 0.009   | <b>0.29</b>         | <b>0.017</b> |
| High <i>MKI67</i> expression  | 1.85              | 0.028   | 1.37                | 0.373        |
| High <i>COL1A2</i> expression | 0.45              | 0.02    | 0.77                | 0.567        |

Because there was correlation between *TGFβ1* and *MKI67* expression, we investigated survival in patients by gene expression status (Table 2). The median survival in the low *TGFβ1*/low *MKI67* expression group was 17 months, whereas patients in the high/high group demonstrated a median survival of 4 months. In the low *TGFβ1*/high *MKI67* expression group, the median survival was 16 months, whereas it was greater than 60 months in the high *TGFβ1*/low *MKI67* expression group (overall  $P = 0.015$ ). All long-term survivors were in the high/low group.

On multivariate Cox regression analyses, high *TGFβ1* expression remained associated with longer survival (Cox HR = 0.29;  $P = 0.017$ ). Neither *MKI67* expression nor *COL1A2*

expression was independently associated with survival on multivariate Cox regression (Table 2). However, a positive surgical margin remained not only statistically associated with worse survival on multivariate analysis, but it had one of the largest associations with overall survival except for high *TGFβ1* expression and a family history of PDAC (Table 2). Importantly, whereas high *TGFβ1* expression is associated with radiotherapy (Table 1) and radiotherapy was associated with survival on univariate analysis (Table 2), on multivariate analysis *TGFβ1* expression remained statistically significantly associated with longer survival and radiotherapy showed less of an overall effect on survival than high *TGFβ1* expression (Cox HR = 0.38,  $P = 0.017$ ).

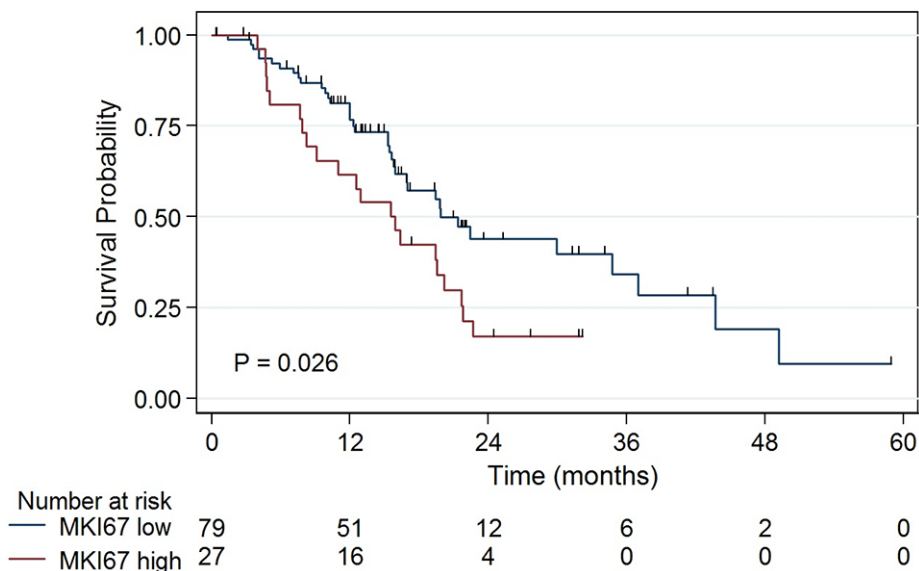

**Figure 2: Patients with tumors demonstrating *TGFβ1* expression  $\geq 75^{\text{th}}$  percentile (high *TGFβ1*) have longer median survival than other patients (> 60 vs 17 months,  $P = 0.005$ ).**

Overexpression of *COL1A2*, a component of collagen production, is associated with high *TGFβ1* expression. We found that 51% of tumors in the high *TGFβ1* expression group had high *COL1A2* expression, whereas only 24% of tumors in the low *TGFβ1* expression group had high *COL1A2* expression ( $P < 0.001$ ). Furthermore, median survival was significantly lower in the low *COL1A2* expression group (Figure 4; 17 versus 44 months;  $P = 0.02$ ). In the low *TGFβ1* expression group, high *COL1A2* expression was associated with improved survival (Cox HR = 0.39;  $P = 0.03$ ). There was no association between *MKI67* and *COL1A2* expression (data not shown;  $P = 0.3$ ).

Of the 106 patients, the overall Kaplan-Meier median survival was 19 months. On univariate analyses, age, positive surgical margins, chemotherapy, radiotherapy, high *TGFβ1* expression, high *MKI67* expression, high *COL1A2* expression, and positive lymph

node spread were all statistically associated with survival (Table 2). Radiotherapy was significantly associated with longer survival in margin-positive (R1 or R2) resections (Cox HR = 0.3;  $P = 0.01$ ), whereas radiotherapy was not significantly associated with longer survival in margin-negative (R0) resection (Cox HR = 0.4;  $P = 0.07$ ).

## DISCUSSION

The *TGFβ1* signaling pathway activates transcription factors intimately involved in many normal and benign functions that, when commandeered by PDAC, permit the cancer to be refractory to standard therapy. For example, fibrosis, a critical response to wound healing, also provides PDAC with a mechanical barrier to chemotherapeutic delivery [23, 24]. Adding to the complexity (and perhaps the paradox), work by Jones et al identified over 30 distinct mutations in the *TGFβ1*

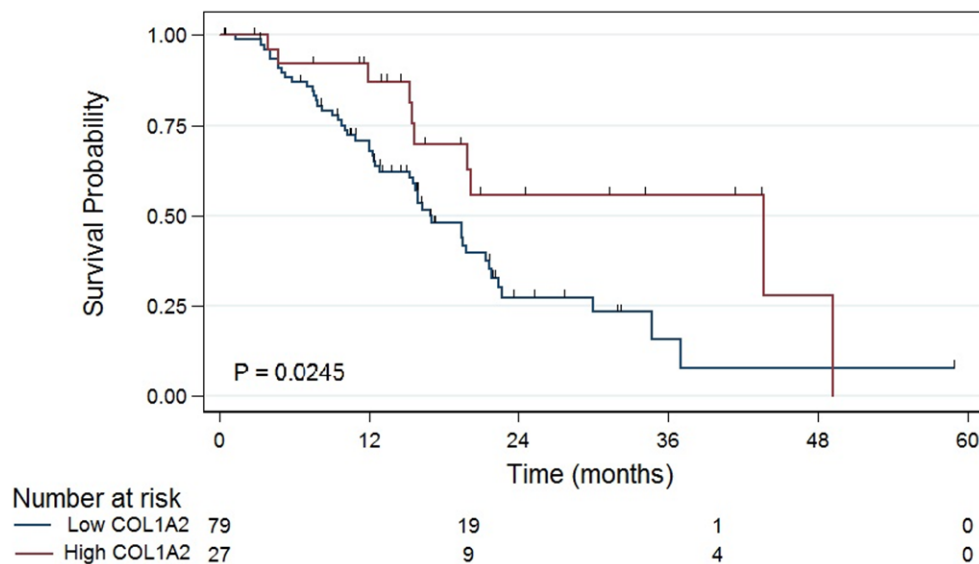

**Figure 3: Patients with tumors demonstrating *MKI67* expression  $\geq 75^{\text{th}}$  percentile have shorter median survival than patients with tumors demonstrating lower *MKI67* expression (16 vs 20 months,  $P = 0.026$ ).**

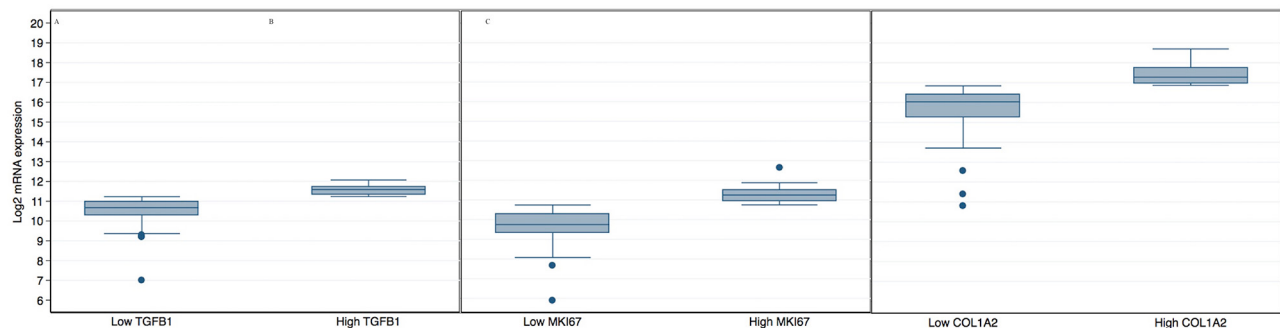

**Figure 4: High expression of *COL1A2* is associated with prolonged survival in patients with resected early-stage pancreatic carcinoma ( $P = 0.0245$ ).**

signaling pathway in 24 pancreatic carcinoma tumors, with 100% of tumors containing at least 1 mutation [25]. While this suggests that the TGF $\beta$ 1 signaling pathway may be extremely important in PDAC carcinogenesis, it also demonstrates that the TGF $\beta$ 1 signaling pathway may be far more complex than other common mutated pathways.

In this study, our data suggest that the TGF $\beta$ 1 paradox may be related to proliferation in patients who undergo pancreaticoduodenectomy for PDAC. High *TGF $\beta$ 1* expression may be able to ameliorate the decreased survival associated with highly proliferative tumors that have high levels of Ki-67 mRNA. Alternatively, high levels of Ki-67 may overwhelm tumor suppressor effects of TGF $\beta$ 1. Importantly, in the multivariate analysis, *MKI67* expression was no longer significant when analyzed in conjunction with the other variables in the model, specifically *TGF $\beta$ 1* and radiotherapy, a treatment that targets proliferating cells. High *TGF $\beta$ 1* expression remained statistically significant and has the greatest association with survival except for family history of PDAC and positive lymph node disease (Table 2). While PDAC family history is a non-modifiable factor, positive lymph node disease is the definition of aggressive tumor biology on the macroscopic level. Further investigations are needed to delineate the signaling interactions between other proliferation markers and the TGF $\beta$  pathway, which may help further unravel the paradox. Finally, the role of Ki-67 in predicting radiosensitivity needs to be elucidated in PDAC.

We investigated the role of *COL1A2* expression by PDAC cells since collagen deposition is often a key component of the desmoplastic response, a component of epithelial to mesenchymal transition, and this specific mRNA transcript may serve as a biomarker for PDAC [8, 19, 26]. Although it has been demonstrated that the peritumoral desmoplasia is created by pancreatic stellate cells [17, 24], we did not identify any evidence in the literature of a relationship between *COL1A2* and survival in patients with PDAC. The data here demonstrated a survival advantage associated with high *COL1A2* expression in patients with PDAC, but, importantly, this was not significant on multivariate analysis where other patients and tumor characteristics dominated the survival model. Most patients in the high *TGF $\beta$ 1* expression group had high *COL1A2* expression and low *MKI67* expression, which was not seen in the low *TGF $\beta$ 1* expression group, suggesting the possibility of other interactions not currently investigated. In the low *TGF $\beta$ 1* expression group, high *COL1A2* expression was statistically associated with improved survival. It is unclear whether PDAC cells are actually producing collagen and creating a desmoplastic response or whether this is an effect (autocrine or otherwise) to aberrant TGF $\beta$ 1 signaling pathways.

While analyzing a large data set such as the TCGA is quite useful to investigate the interaction of gene

expression and clinical data, there are some significant limitations. The major limitation of this analysis is the inability to interrogate tissue specimens or use patient-derived samples to test hypotheses. Specifically, correlating TGF $\beta$ 1 serum levels, TGF $\beta$ 1 tissue levels, and clinical outcomes is a future research target to help exact the relationship between *MKI67* expression and TGF $\beta$ 1 levels. However, these data can serve to outline future research targets, specifically the interaction between cellular proliferation and TGF $\beta$ 1 pathways. Furthermore, we attempted to limit the effects of the TGF $\beta$ 1 paradox by using strict inclusion/exclusion criteria to identify patients with “early” disease. However, there is no method to objectively define this patient population other than the self-fulfilling prophecy of investigating patients with only stage I and II PDAC who went to resection. This is selection bias is difficult to quantify.

In summary, our study demonstrates the potential role of proliferation to help understand the TGF $\beta$ 1 paradox. Patients with early-stage PDAC have longer median survival when *TGF $\beta$ 1* expression is high, which may be due to limited cellular proliferation. Further work is needed to delineate the mechanism of this interaction, investigate it in patients with advanced PDAC, and identify opportunities to modulate the intra- and extracellular TGF $\beta$ 1 signaling cascade to improve survival and decrease PDAC proliferation.

## PATIENTS AND METHODS

### Patients and data acquisition

Data from TCGA were downloaded on February 5, 2016. Clinical data, tumor DNA sequence, and mRNA expression data were acquired from the TCGA data set from the data access committee. Except for a single patient, this represents an untreated patient population with PDAC who went directly to surgery for resection. After resection, tumor specimens were dissected from surrounding stroma. mRNA was sequenced with next generation sequencing, usually on the Illumina platform, as part of the TCGA network with quality controls in place at multiple steps. The TCGA project has been well-described elsewhere [27], but briefly it is a consortium of numerous institutions collaborating to collect, analyze, and integrate data at the genomic, RNA, proteomic, and clinical level for a number of human malignancies.

### Inclusion and exclusion criteria

Inclusion criteria were complete data available, pancreatic adenocarcinoma or ductal carcinoma histology, American Joint Committee on Cancer (AJCC) stage I or II, and underwent pancreaticoduodenectomy. Patients with stage III or IV disease based on the 7th edition of the AJCC staging system were excluded.

## Expression and gene analyses

Patient clinical data (Level 2.0.46.0) and RNASeqV2 normalized gene expression data (Level 3.1.8.0) were downloaded from the TCGA data portal (<https://tcga-data.nci.nih.gov/>) open access HTTP directory. Gene expression data were further normalized against the median sample using IRON v2.1.6 (iron\_generic --rnaseq --unlog) to correct for the remaining minor differences in dynamic range between samples [28]. High gene expression was based on  $\geq 75$ th percentile  $\log_2$  mRNA expression value for each gene. Low gene expression was based on values  $< 75$ th percentile  $\log_2$  mRNA expression value for each gene. We specifically investigated the relationship among *TGF $\beta$ 1*, *MKI67*, and *COL1A2* and survival in patients with resected PDAC in the head of the pancreas and staged as I or II.

## Statistical analyses

Data analyses were performed with STATA 13 (StataCorp LP, College Station, TX). Significance was set to  $\alpha = 0.05$ . Differences in variables between the two groups were investigated with Student *t* test or  $\chi^2$  as appropriate. Overall survival was investigated with the Kaplan-Meier method utilizing the log-rank test. Censoring occurred for days to last follow-up with the number of patients at risk listed for each time point below the graphs. Variables associated with survival were investigated with univariate and multivariate Cox regression analyses with the proportional hazard ratio (HR). The multivariate survival model was based on clinical and gene expression data as described below utilizing a cut-off of univariate  $P = 0.1$  to be included in the model.

## ACKNOWLEDGMENTS AND FUNDING SUPPORT

The authors would like to thank Rasa Hamilton and Kim Murphy for administrative support. The results shown here are based on data generated by the TCGA Research Network: <http://cancergenome.nih.gov/>. Our study received assistance from the Cancer Informatics Core Facility at the H. Lee Moffitt Cancer Center & Research Institute, an NCI-designated Comprehensive Cancer Center, supported under NIH grant P30-CA76292. Part of this work was presented at the AACR Special Conference on Pancreatic Cancer (May 12-15, 2016, Orlando, FL).

## CONFLICTS OF INTEREST

The authors declare no conflicts of interest.

## REFERENCES

1. Massague J. TGF beta signalling in context. *Nat Rev Mol Cell Biol.* 2012; 13:616-630.
2. Akhurst RJ and Hata A. Targeting the TGF beta signalling pathway in disease. *Nat Rev Drug Discov.* 2012; 11:790-811.
3. Zhang H, Liu C, Kong Y, Huang H, Wang C and Zhang H. TGFbeta signaling in pancreatic ductal adenocarcinoma. *Tumour Biol.* 2015; 36:1613-1618.
4. Heldin CH, Landstrom M and Moustakas A. Mechanism of TGF-beta signaling to growth arrest, apoptosis, and epithelial-mesenchymal transition. *Curr Opin Cell Biol.* 2009; 21:166-176.
5. Moustakas A and Heldin CH. The regulation of TGFbeta signal transduction. *Development.* 2009; 136:3699-3714.
6. Kubiczкова L, Sedlarikova L, Hajek R and Sevcikova S. TGF-beta - an excellent servant but a bad master. *J Transl Med.* 2012; 10:183.
7. Judge JL, Owens KM, Pollock SJ, Woeller CF, Thatcher TH, Williams JP, Phipps RP, Sime PJ and Kottmann RM. Ionizing radiation induces myofibroblast differentiation via lactate dehydrogenase. *Am J Physiol Lung Cell Mol Physiol.* 2015; 309:L879-887.
8. Shields MA, Ebine K, Sahai V, Kumar K, Siddiqui K, Hwang RF, Grippo PJ and Munshi HG. Snail cooperates with KrasG12D to promote pancreatic fibrosis. *Mol Cancer Res.* 2013; 11:1078-1087.
9. Akinleye A, Iragavarapu C, Furqan M, Cang S and Liu D. Novel agents for advanced pancreatic cancer. *Oncotarget.* 2015; 6:39521-39537. doi: 10.18632/oncotarget.3999.
10. Craven KE, Gore J, Wilson JL and Korc M. Angiogenic gene signature in human pancreatic cancer correlates with TGF-beta and inflammatory transcriptomes. *Oncotarget.* 2016; 7:323-341. doi: 10.18632/oncotarget.6345.
11. Gore J, Craven KE, Wilson JL, Cote GA, Cheng M, Nguyen HV, Cramer HM, Sherman S and Korc M. TCGA data and patient-derived orthotopic xenografts highlight pancreatic cancer-associated angiogenesis. *Oncotarget.* 2015; 6:7504-7521. doi: 10.18632/oncotarget.3233.
12. Hezel AF, Deshpande V, Zimmerman SM, Contino G, Alagesan B, O'Dell MR, Rivera LB, Harper J, Lonning S, Brekken RA and Bardeesy N. TGF-beta and alphavbeta6 integrin act in a common pathway to suppress pancreatic cancer progression. *Cancer Res.* 2012; 72:4840-4845.
13. Candido J and Hagemann T. Cancer-Related Inflammation. *J Clin Immunol.* 2013; 33:S79-S84.
14. Pickup M, Novitskiy S and Moses HL. The roles of TGF beta in the tumour microenvironment. *Nat Rev Cancer.* 2013; 13:788-799.
15. Medina A and Ghahary A. Fibrocytes can be reprogrammed to promote tissue remodeling capacity of dermal fibroblasts. *Mol Cell Biochem.* 2010; 344:11-21.

16. Yen TW, Aardal NP, Bronner MP, Thorning DR, Savard CE, Lee SP and Bell RH, Jr. Myofibroblasts are responsible for the desmoplastic reaction surrounding human pancreatic carcinomas. *Surgery*. 2002; 131:129-134.
17. Incio J, Suboj P, Chin SM, Vardam-Kaur T, Liu H, Hato T, Babykutty S, Chen I, Deshpande V, Jain RK and Fukumura D. Metformin reduces desmoplasia in pancreatic cancer by reprogramming stellate cells and tumor-associated macrophages. *PLoS One*. 2015; 10:e0141392.
18. Kuninty PR, Bojmar L, Tjomsland V, Larsson M, Storm G, Ostman A, Sandstrom P and Prakash J. MicroRNA-199a and -214 as potential therapeutic targets in pancreatic stellate cells in pancreatic tumor. *Oncotarget*. 2016; 7:16396-408. doi: 10.18632/oncotarget.7651.
19. Zhang X, Tong P, Chen J, Pei Z, Zhang X, Chen W, Xu J and Wang J. Identification of novel biomarkers for pancreatic cancer using integrated transcriptomics with functional pathways analysis. *J Cell Physiol*. 2016.
20. Kim H, Park CY, Lee JH, Kim JC, Cho CK and Kim HJ. Ki-67 and p53 expression as a predictive marker for early postoperative recurrence in pancreatic head cancer. *Ann Surg Treat Res*. 2015; 88:200-207.
21. Jamieson NB, Carter CR, McKay CJ and Oien KA. Tissue biomarkers for prognosis in pancreatic ductal adenocarcinoma: a systematic review and meta-analysis. *Clin Cancer Res*. 2011; 17:3316-3331.
22. Glazer ES, Kaluarachchi WD, Massey KL, Zhu C and Curley SA. Bioengineered arginase I increases caspase-3 expression of hepatocellular and pancreatic carcinoma cells despite induction of argininosuccinate synthetase-1. *Surgery*. 2010; 148:310-318.
23. Koerdt S, Rohleder NH, Rommel N, Nobis C, Stoeckelhuber M, Pigorsch S, Duma MN, Wolff KD and Kesting MR. An expression analysis of markers of radiation-induced skin fibrosis and angiogenesis in wound healing disorders of the head and neck. *Radiat Oncol*. 2015; 10:202.
24. Moir JA, Mann J and White SA. The role of pancreatic stellate cells in pancreatic cancer. *Surg Oncol*. 2015; 24:232-238.
25. Jones S, Zhang X, Parsons DW, Lin JC, Leary RJ, Angenendt P, Mankoo P, Carter H, Kamiyama H, Jimeno A, Hong SM, Fu B, Lin MT, Calhoun ES, Kamiyama M, Walter K, et al. Core signaling pathways in human pancreatic cancers revealed by global genomic analyses. *Science*. 2008; 321:1801-1806.
26. Kim H, Choi JA and Kim JH. Ras promotes transforming growth factor-beta (TGF-beta)-induced epithelial-mesenchymal transition via a leukotriene B4 receptor-2-linked cascade in mammary epithelial cells. *J Biol Chem*. 2014; 289:22151-22160.
27. Cancer Genome Atlas Research N, Weinstein JN, Collisson EA, Mills GB, Shaw KR, Ozenberger BA, Ellrott K, Shmulevich I, Sander C and Stuart JM. The Cancer Genome Atlas Pan-Cancer analysis project. *Nat Genet*. 2013; 45:1113-1120.
28. Welsh EA, Eschrich SA, Berglund AE and Fenstermacher DA. Iterative rank-order normalization of gene expression microarray data. *BMC Bioinformatics*. 2013; 14:153.
